# Supplementary material
Source: PubMed Central journal article supplement (PMC4387198)
Supplement: NIHMS671214-supplement-supplemental_data.pdf [file NIHMS671214-supplement-supplemental_data.pdf]

Neuron, Volume 73

## **Supplemental Information**

### **Homeodomain Protein Otp**

### **and Activity-Dependent Splicing**

### **Modulate Neuronal Adaptation to Stress**

**Liat Amir-Zilberstein, Janna Blechman, Yehezkel Sztainberg, William H.J. Norton, Adriana Reuveny, Nataliya Borodovsky, Maayan Tahor, Joshua L. Bonkowsky, Laure Bally-Cuif, Alon Chen, and Gil Levkowitz**

### **Supplemental Inventory**

#### **1. Supplemental Figures**

Figure S1, related to Figure 1

Figure S2, related to Figure 1

Figure S3, related to Figure 3

Figure S4, related to Figure 3

Figure S5, related to Figure 6

Figure S6, related to Figure 6

#### **2. Supplemental Experimental Procedures**

Table S1

Table S2

Table S3

 *crh* mRNA  
 *Otp* protein

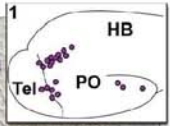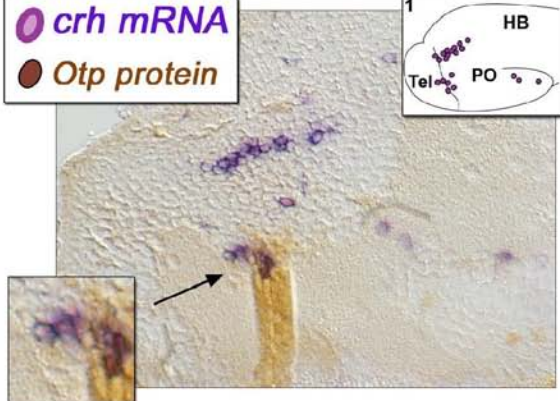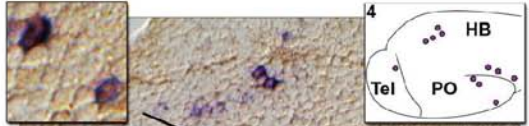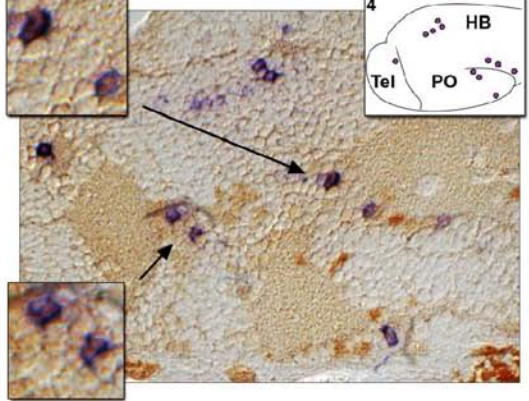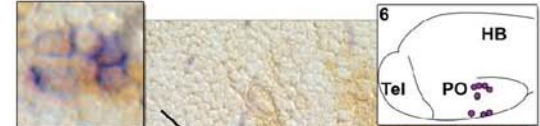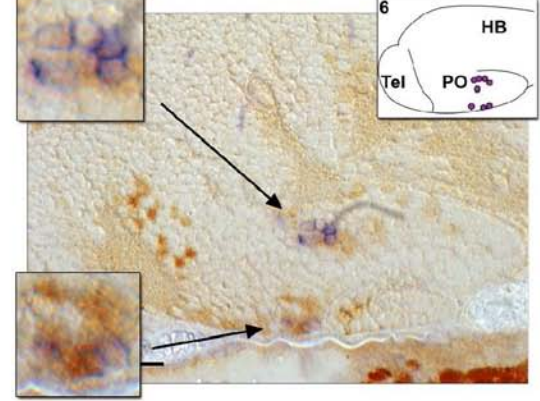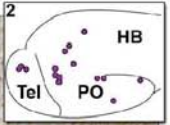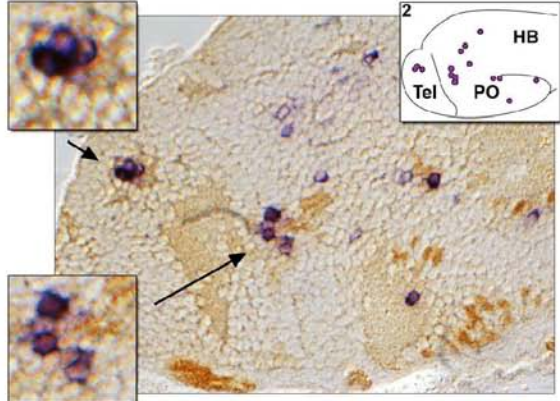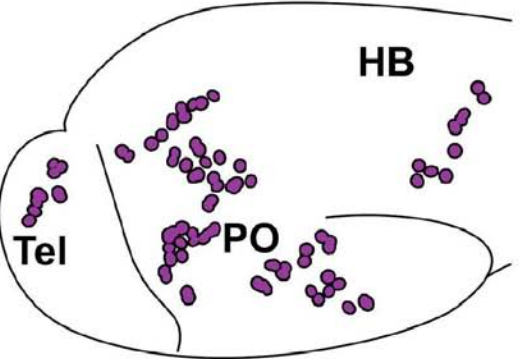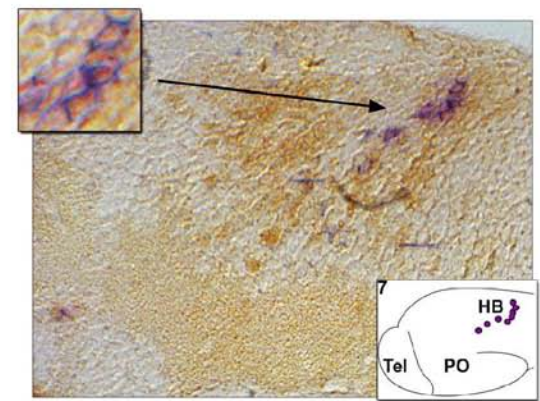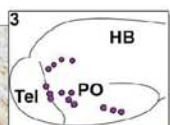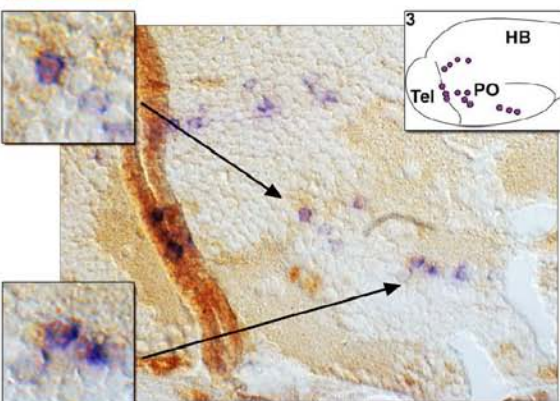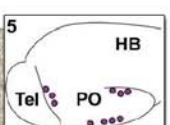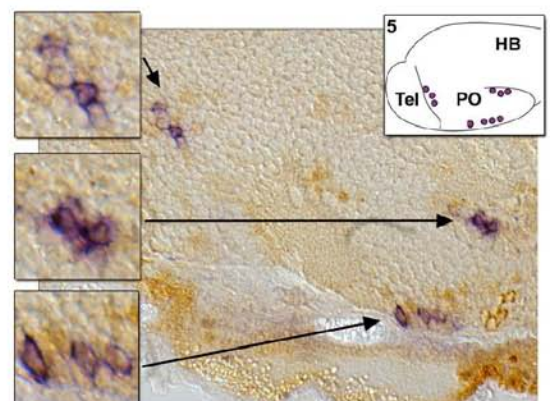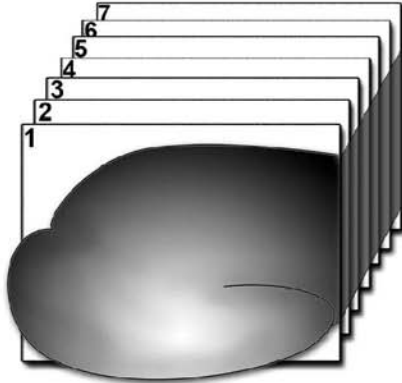

**Figure S1. Expression of Otp and CRH in 6-day-old Zebrafish Larva, Related to Figure 1**

Serial sagittal sections (6  $\mu\text{m}$ ) of 6-day old zebrafish larva subjected to whole mount *in situ* hybridization with a *crh*- directed probe (purple) followed by paraffin embedment and sectioning, antigen retrieval and immuno-staining with an anti-Otp antibody (brown). The scheme in the center of the figure depicts the location of the major CRH+ neuronal clusters in 6-day old larva, whereas schemes shown in the insets of the image panels depict the subsets of CRH+ cells in each of the tissue sections. High-magnifications of *crh*+;Otp+ neuronal clusters (arrows) are also presented.

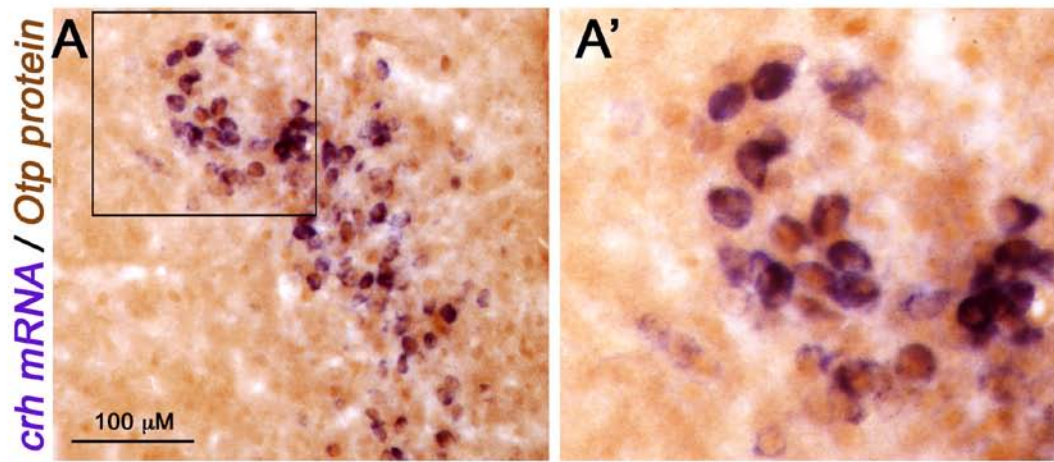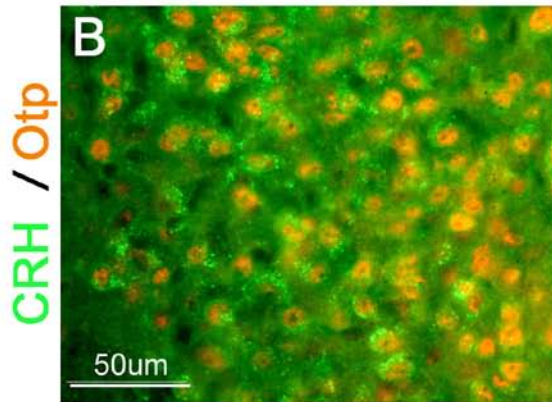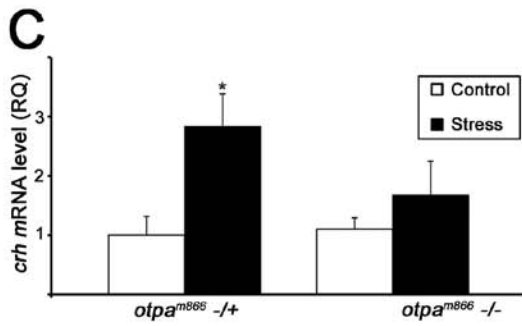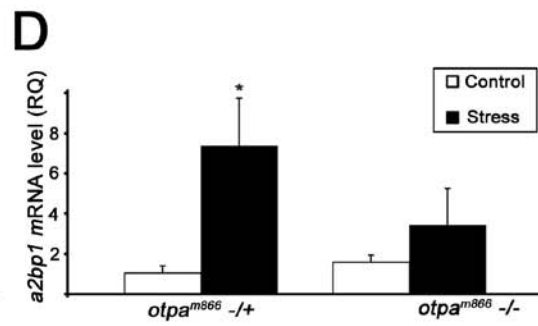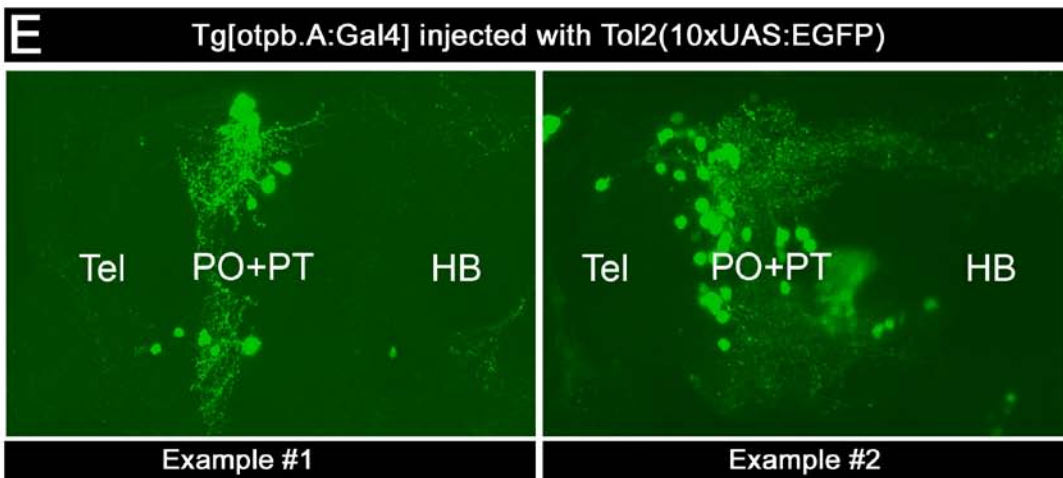

**Figure S2. Expression of Otp and CRH in the Mouse PVN and Levels of Zebrafish *crh* in Response to Osmotic Challenge, Related to Figure 1**

(A and B) Expression of Otp and CRH in the mouse PVN. Coronal sections through the adult mouse hypothalamus showing colocalization of Otp and *crh* in the mouse paraventricular nucleus.

(A) Floating brain sections were subjected to *in situ* hybridization with a *crh*- directed probe followed by immuno-staining with an anti-Otp antibody. High-magnification of the *crh*+;Otp+ area (black rectangle) is shown in panel A'.

(B) Double immuno-fluorescence staining with guinea pig anti-CRH antibody (Bachem California, Torrance, USA) together with rabbit anti-Otp antibody, which was generated in our lab.

(C and D) Attenuated osmotic stress response in *otpa*<sup>m866</sup> mutant. Osmotic stress challenge was applied to 6 day-old progenies of a *otpa*<sup>m866</sup>-/+ cross by incubation in 50% artificial seawater for 4 min (See details in the *Supporting Material*). The amounts of *crh* (C, n=6) and *a2bp1* (D, n=5) mRNAs were measured in control and stressed fish larvae using quantitative PCR (qPCR). Larvae were genotyped by sequencing and *crh* mRNA levels of mutant (-/-) and heterozygous (-/+) animals were plotted accordingly. \*p<0.05.

(E) Representative examples of *otp*:Gal4 transgenic line that was co-injected with transposon-based (Tol2) vector harboring EGFP under the control of UAS elements together with *transposase* mRNA. EGFP expression is readily visible in 6-day old larvae.

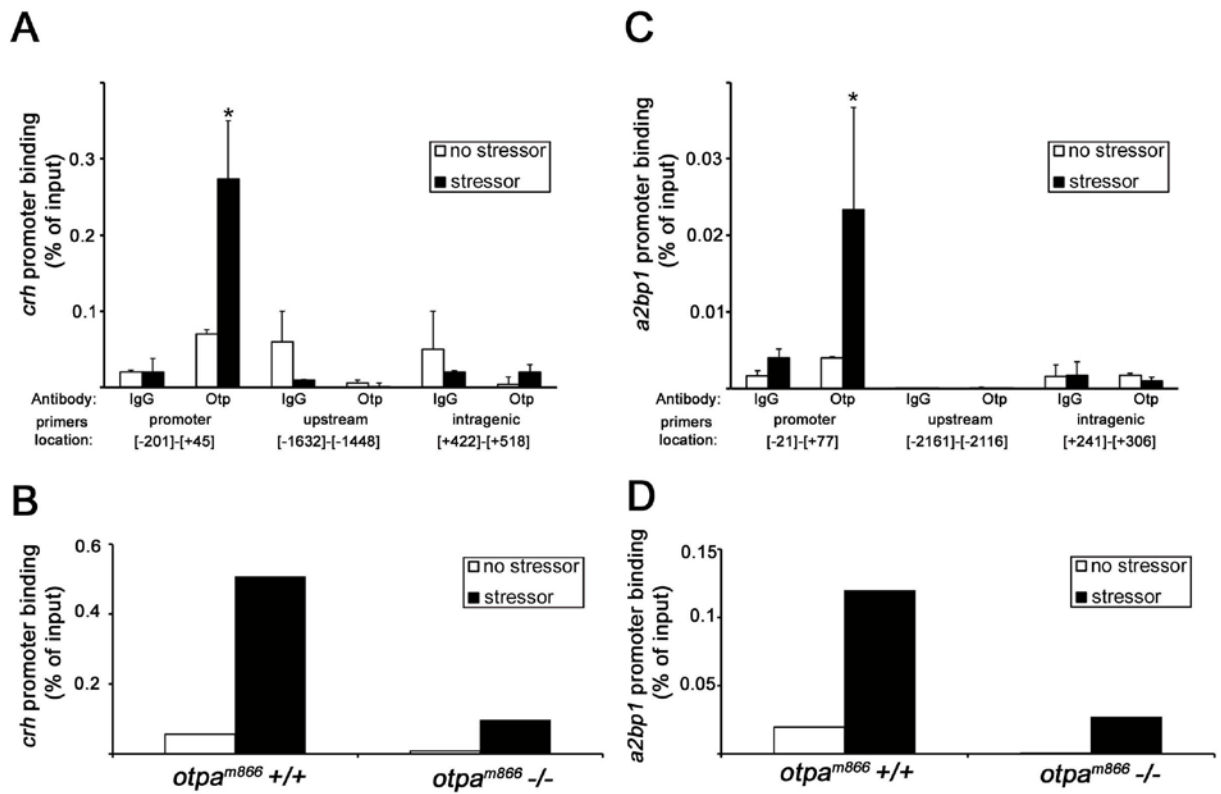

**Figure S3. Specificity of Otp Association with *crh* and *a2bp1/rbfox1* in Zebrafish Larvae, Related to Figure 3**

(A and C) Histograms showing quantitative ChIP analyses of the recruitment of Otp to *crh* (A, \* $p < 0.05$ ,  $n = 3$ ) and *a2bp1* (C, \* $p \leq 0.1$ ,  $n = 3$ ) promoters compared to remote upstream and intragenic regions within the *crh* and *a2bp1* gene loci and compared to binding of control rabbit IgG antibody. Chromatin was extracted from a pool of 50 larvae per treatment 30 min after physical challenges, followed by anti-Otp ChIP.

(B and D) ChIP analysis of Otp in the *otpa<sup>m866</sup>* mutant allele. Histograms showing quantitative ChIP analyses of the recruitment Otp to *crh* (B) and *a2bp1* (D) promoters. Chromatin was extracted from a pool of 50 larvae per treatment 30 min after physical challenges, followed by anti-Otp ChIP. The genomic locations [relative to the transcription start (+1) site] of the oligonucleotide primers used for ChIP analyses are shown at the bottom and their sequences are presented in the Table S2.

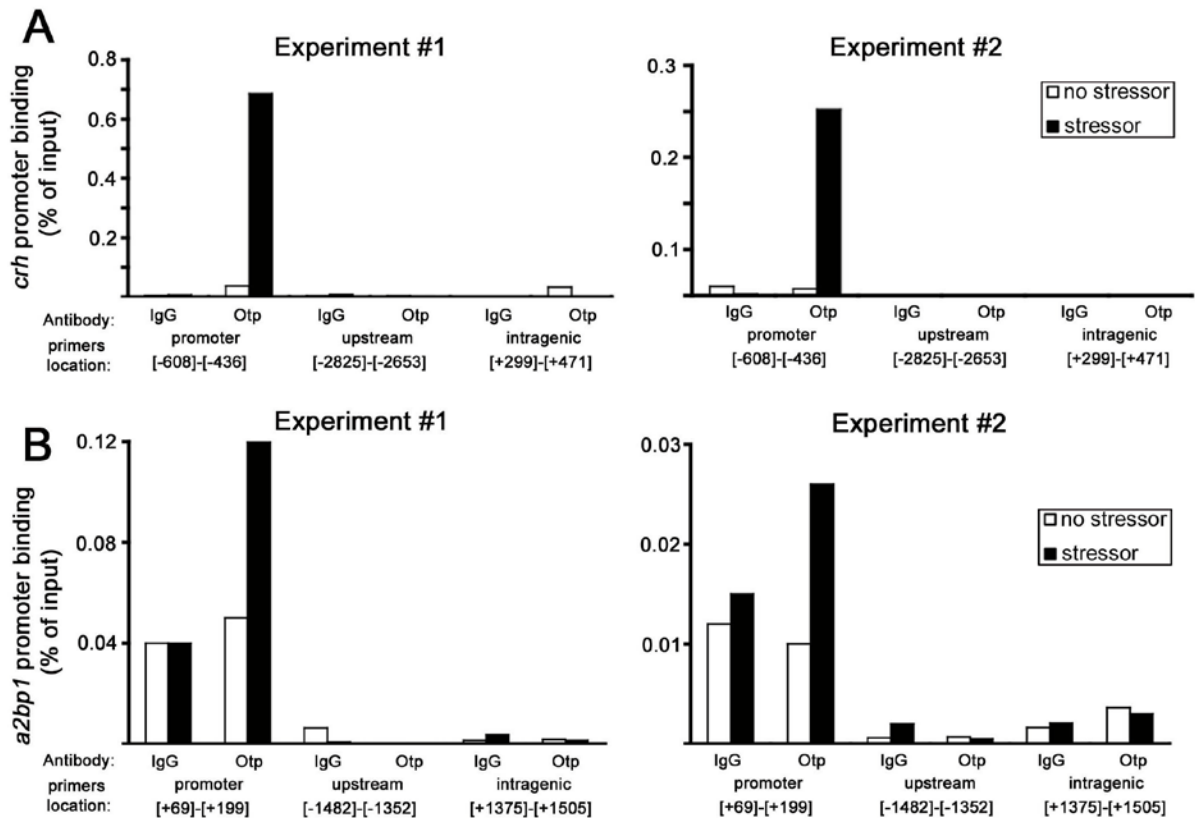

**Figure S4. Otp Is Recruited to the Mouse *crh* and *a2bp1/rbfox1* Promoters following Psychological Stressors, Related to Figure 3**

Histograms showing quantitative ChIP analyses of the recruitment of Otp to *crh* (A) or *a2bp1* (B) gene loci in two independent experiments. Mice were subjected to restraint stress or left unchallenged and PVN were dissected from mice 30 and 60 min after the initiation of the respective restraint (A) and foot shock (B) stressors. Chromatin was extracted from a pool of 5 animals per treatment followed by anti-Otp ChIP. Recruitment of Otp to the respective promoter was assessed by quantitative PCR and calculated relative to the amount of input chromatin.

The specificity of Otp association with *crh* and *a2bp1* promoters is demonstrated by the lack of Otp binding to remote upstream and intragenic regions within the *crh* and *a2bp1* gene loci and by comparing to binding of control rabbit IgG antibody. The genomic locations [relative to the transcription start (+1) site] of the oligonucleotide primers used for ChIP analyses are shown at the bottom and their sequences are presented in the Supplemental Table S2.

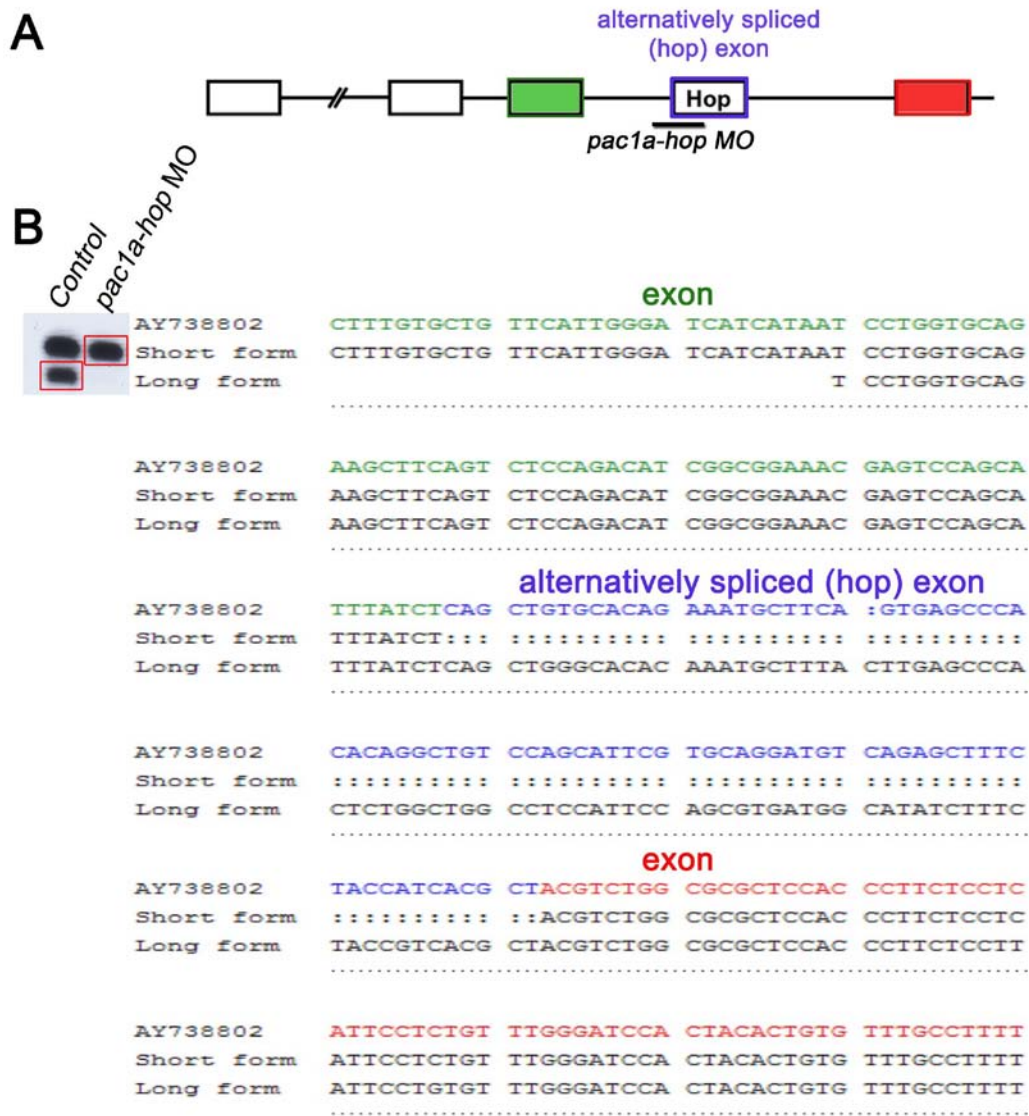

**Figure S5. Inhibition of Alternative Splicing by *pac1a-hop* Antisense Morpholinos, Related to Figure 6**

(A) Scheme depicting *pac1a* gene structure as well as antisense MO binding site. Alternative splicing of the zebrafish *pac1a* gene was blocked by microinjecting (at 1.5 ng/1.7 nl) synthetic antisense morpholino oligonucleotides (*pac1a-hop* MO, Gene Tools, LLC, Corvallis, OR).

(B) *pac1a* cDNA fragments were amplified from either control or larvae (6 day-old), which were injected with *pac1a-hop* MO followed by gel electrophoresis. The image on the left shows the short (*pac1a*) and long (*pac1a-hop*) splice variant in the control sample, while only the short isoform, which lacks the exon encoding to the ‘hop’ cassette is detected in *pac1a-hop* MO- injected sample. DNA fragments of the short and long isoforms, marked by red rectangles, were excised from the gel and analyzed by sequencing to confirm the integrity of *pac1a* reading frame in *pac1a-hop* MO- injected larvae. The oligonucleotide primers used to amplify the cDNA fragments of *pac1a* splice variants were had the following sequences: Forward: ATGAATGATAACACTGCCCTC, Reverse: CCAGGCCGAGCTCAAAGACC.



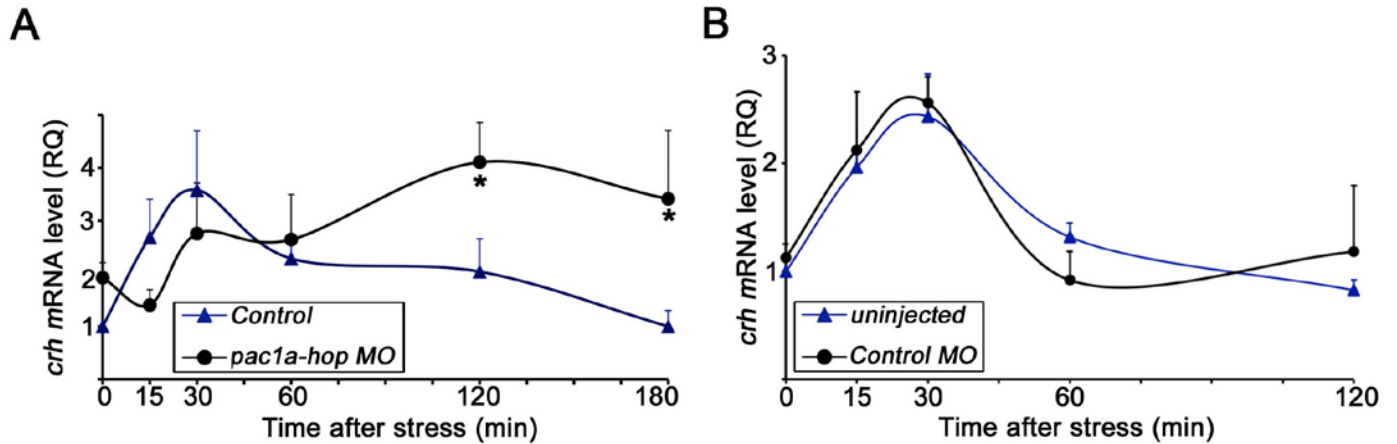

**Figure S6. Effects of *pac1a-hop* and Control Morpholino Oligonucleotides on the Kinetics of Stress-Induced *crh* Levels, Related to Figure 6**

Osmotic (A) or physical (B) stress challenges (see ‘*Experimental Procedures*’) were applied to mock-treated larvae (A, ‘*Control*’) or uninjected larvae (B) or their respective siblings, which were injected (each embryo at 1.5 ng/1.7 nl) with either splice-blocking *pac1a-hop* MO (A) or unrelated morpholino oligonucleotide (B).

The amount of *crh* mRNA was measured in individual fish larva (A, n=9) or in pools of 10 larva per treatment (B, n=3) at different time points of recovery using quantitative PCR (qPCR). \* $p \leq 0.05$

## Supplemental Experimental Procedures

**Table S1. Oligonucleotide Primers for Quantitative PCR Analysis**

### Zebrafish

| <b>Gene</b>                 | <b>Primers</b>                               | <b>Acession Number</b> | <b>Fragment size (bp)</b> |
|-----------------------------|----------------------------------------------|------------------------|---------------------------|
| <i>crh</i>                  | ccgatttccttagatctgac<br>cactatggtacagagtattc | NM_001007379           | 190                       |
| <i>a2bp1/rbfox-1</i>        | catatttaatgaacgagg<br>ccgtgccgtgtaatttctc    | NM_001005596           | 95                        |
| <i>pac1a-hop<br/>(long)</i> | gagctttctaccatcagct<br>cccgttgctgaaatcctc    | AY738800               | 112                       |
| <i>β-actin</i>              | gaggctctctccagccttc<br>cggatgtccacgtcgcacttc | NM_131031              | 95                        |

### Mouse

| <b>Gene</b>                | <b>Primers</b>                                  | <b>Acession Number</b> | <b>Fragment size (bp)</b> |
|----------------------------|-------------------------------------------------|------------------------|---------------------------|
| <i>crh</i>                 | gcatgcacaaagtgtatttc<br>ctttaagatatcgctataaag   | NT_162143              | 105                       |
| <i>a2bp1/rbfox1</i>        | ctgctgctcagaccaggtg<br>gttggtctctcactccag       | NM_021477              | 130                       |
| <i>pac1-hop<br/>(long)</i> | gcaatgagtcgagcatctac<br>gagtaatggtggatagttctg   | NM_007407              | 105                       |
| <i>pac1<br/>(short)</i>    | gggccagccgtaagtagatgctc<br>ctataatggttaactttgtg | NM_001025372           | 112                       |
| <i>hprt</i>                | gcagtacagccccaaaatgg<br>ggtcctttcaccagcaagct    | J00423                 | 52                        |

**Table S2. Oligonucleotide Primers for Quantitative ChIP Analysis****Zebrafish**

| <b>Gene</b>                         | <b>Primers</b>                               | <b>ZFIN ID</b>         | <b>Fragment size (bp)</b> |
|-------------------------------------|----------------------------------------------|------------------------|---------------------------|
| <i>crh</i>                          | gtgtggattcaatctgaagg<br>gttgacacctctgtctaag  | ZDB-GENE-<br>041114-75 | 246                       |
| <i>crh -<br/>upstream</i>           | gcatgacatgctgcacattc<br>ggccaagtaaattccacttc | ZDB-GENE-<br>041114-75 | 184                       |
| <i>crh -<br/>intragenic</i>         | ctgttggaggggaaagtgg<br>ctcctccgacctgcgctc    | ZDB-GENE-<br>041114-75 | 96                        |
| <i>a2bp1/rbfox-1</i>                | actcgctacacacacagc<br>ctaagcagctgccttagtc    | ZDB-GENE-<br>040927-11 | 98                        |
| <i>a2bp1/rbfox-1<br/>upstream</i>   | gttccaaaccttctctgtac<br>gaagaaagctgaaactgtta | ZDB-GENE-<br>040927-11 | 45                        |
| <i>a2bp1/rbfox-1<br/>intragenic</i> | cattactacggattaagtc<br>gcaacaaaccatttaagttc  | ZDB-GENE-<br>040927-11 | 65                        |

**Mouse**

| <b>Gene</b>                          | <b>Primers</b>                               | <b>Gene ID</b> | <b>Fragment size (bp)</b> |
|--------------------------------------|----------------------------------------------|----------------|---------------------------|
| <i>crh</i>                           | cctaaagaacccagttcagg<br>gttctcccacctctaaaac  | 12918          | 172                       |
| <i>crh -<br/>upstream</i>            | ggagcaacacacatatcagc<br>ctaacatgaaaatagcagtg | 12918          | 140                       |
| <i>crh -<br/>intragenic</i>          | gcaaggcaggcaggacgac<br>gagcgcccctaacatgcggc  | 12918          | 79                        |
| <i>a2bp1/rbfox-<br/>1</i>            | ctcaggacaaatgccttctc<br>caacatgactaaccaatac  | 268859         | 99                        |
| <i>a2bp1/rbfox-<br/>1 upstream</i>   | caccatgattccacgccatg<br>ccgaaatgaaaggcattgag | 268859         | 120                       |
| <i>a2bp1/rbfox-<br/>1 intragenic</i> | ggatactattgctacacttc<br>caagttccctccttggtgc  | 268859         | 78                        |

**Table S3. Antisense Morpholino Knockdown Oligonucleotides**

| <b>Name</b>       | <b>Location</b>         | <b>Sequence</b>           |
|-------------------|-------------------------|---------------------------|
| <i>pac1a-ATG</i>  | translation (ATG) start | TCGCCGCTTGTCTATACATTCTGCT |
| <i>pac1a-hop</i>  | hop splice site         | AGCTGCTAAACACGACAAAGACAAC |
| <i>Control MO</i> | no match in genome      | ATGACACTGGACCCCACTCACCTCC |
